# Supplementary material for: A Paleogenomic Reconstruction of the Deep Population History of the Andes
Source: PubMed Central journal article supplement (PMC7304944; doi:10.1016/j.cell.2020.04.015), 2020-05-28
Supplement: NIHMS1585754-supplement-13.pdf [file NIHMS1585754-supplement-13.pdf]

|                                           | WestAmazon_SanMartin_Modern | NorthPeruCoast_1750-560BP vs. Lauricocha_5800BP | NorthPeruHighlands_1200-550BP vs. Lauricocha_5800BP | NorthPeruHighlands_LaGalgada_4100BP vs. Lauricocha_5800BP | NorthPeruHighlands_Lauricocha_8600BP vs. Lauricocha_5800BP | NorthPeruHighlands_Lauricocha_5800BP | NorthPeruHighlands_Lauricocha_3500BP vs. Lauricocha_5800BP | CentralPeruCoast_1850-480BP vs. Lauricocha_5800BP | SouthPeruCoast_1480-515BP vs. Cuncaicha_4200BP | SouthPeruHighlands_1150-390BP vs. Cuncaicha_4200BP | Cuncaicha_9000BP vs. Cuncaicha_4200BP | Cuncaicha_4200BP | Cuncaicha_3300BP vs. Cuncaicha_4200BP | Cusco_SanSebastian_610-490BP | Cusco_Torontoy_A_450BP vs. Cusco_SanSebastian_610-490BP | Cusco_Torontoy_B_450BP vs. Cusco_SanSebastian_610-490BP | TiticacaBasin_Tiwanaku_1000BP vs. MiraFlores_11000BP | TiticacaBasin_Chile_Pukara_700BP vs. MiraFlores_1100BP | TiticacaBasin_RioUncallane_1700BP vs. MiraFlores_1100BP | TiticacaBasin_MiraFlores_1100BP | TiticacaBasin_Iroco_1050BP vs. MiraFlores_11100BP | NorthChile_1350-570BP vs. MiraFlores_1100BP | Argentina_LagunaChica_1600BP vs. Argentina_LagunaChica_8600BP | Argentina_LagunaChica_8600BP |
|-------------------------------------------|-----------------------------|-------------------------------------------------|-----------------------------------------------------|-----------------------------------------------------------|------------------------------------------------------------|--------------------------------------|------------------------------------------------------------|---------------------------------------------------|------------------------------------------------|----------------------------------------------------|---------------------------------------|------------------|---------------------------------------|------------------------------|---------------------------------------------------------|---------------------------------------------------------|------------------------------------------------------|--------------------------------------------------------|---------------------------------------------------------|---------------------------------|---------------------------------------------------|---------------------------------------------|---------------------------------------------------------------|------------------------------|
| WestAmazon_SanMartin_Modern               | -                           | 3.3                                             | 3.1                                                 | 1.6                                                       | -1.3                                                       | -                                    | 0.8                                                        | 2.7                                               | -0.9                                           | 0.4                                                | -1.9                                  | -                | -0.5                                  | -                            | 2.7                                                     | 2.4                                                     | 0.1                                                  | 0.5                                                    | 0.1                                                     | -                               | 0.3                                               | 1.5                                         | 2.5                                                           | -                            |
| NorthPeruCoast_1750-560BP (EIP-LIP)       | -                           | -                                               | 3.8                                                 | 3.9                                                       | -2.4                                                       | -                                    | -0.8                                                       | 2.1                                               | 2.9                                            | 3.4                                                | -1.1                                  | -                | -1.3                                  | -                            | 3.1                                                     | -1.1                                                    | 0.5                                                  | 1.0                                                    | -3.0                                                    | -                               | -1.0                                              | 0.3                                         | 2.8                                                           | -                            |
| NorthPeruHighlands_1200-550BP (MH-LIP)    | -                           | 0.1                                             | -                                                   | 2.5                                                       | -2.7                                                       | -                                    | -0.7                                                       | 1.1                                               | 1.7                                            | 2.9                                                | -2.3                                  | -                | -2.5                                  | -                            | 0.2                                                     | -1.1                                                    | 1.1                                                  | 2.6                                                    | -1.6                                                    | -                               | -0.3                                              | 0.5                                         | 2.4                                                           | -                            |
| NorthPeruHighlands_LaGalgada_4100BP (LA)  | -                           | -0.4                                            | 1.0                                                 | -                                                         | -3.3                                                       | -                                    | -0.6                                                       | -0.5                                              | 1.9                                            | 2.7                                                | -1.3                                  | -                | -1.1                                  | -                            | 1.5                                                     | -1.6                                                    | 1.0                                                  | 1.6                                                    | -1.3                                                    | -                               | -1.4                                              | 1.0                                         | 3.2                                                           | -                            |
| NorthPeruHighlands_Lauricocha_8600BP (EA) | -                           | -6.6                                            | -4.4                                                | -3.4                                                      | -                                                          | -                                    | 0.5                                                        | -5.4                                              | -1.4                                           | 0.1                                                | -0.6                                  | -                | -2.0                                  | -                            | 0.5                                                     | -0.3                                                    | 0.3                                                  | 1.7                                                    | -1.1                                                    | -                               | -0.8                                              | -0.2                                        | 2.4                                                           | -                            |
| NorthPeruHighlands_Lauricocha_5800BP (MA) | -                           | -                                               | -                                                   | -                                                         | -                                                          | -                                    | -                                                          | -                                                 | 0.0                                            | 1.9                                                | -0.1                                  | -                | -1.6                                  | -                            | -0.2                                                    | 0.8                                                     | 0.4                                                  | 1.1                                                    | -1.5                                                    | -                               | -1.0                                              | -2.1                                        | 0.9                                                           | -                            |
| NorthPeruHighlands_Lauricocha_3500BP (IP) | -                           | -7.8                                            | -5.7                                                | -3.8                                                      | -3.0                                                       | -                                    | -                                                          | -6.6                                              | -0.9                                           | 0.4                                                | -1.3                                  | -                | -2.8                                  | -                            | 1.1                                                     | 1.1                                                     | 2.0                                                  | 1.9                                                    | 0.2                                                     | -                               | 0.3                                               | -0.8                                        | 2.9                                                           | -                            |
| CentralPeruCoast_1850-480BP (EIP-LIP)     | -                           | -0.6                                            | 2.2                                                 | 1.7                                                       | -3.2                                                       | -                                    | -1.1                                                       | -                                                 | 3.0                                            | 3.8                                                | -0.6                                  | -                | -0.2                                  | -                            | 2.2                                                     | -1.2                                                    | 1.5                                                  | 2.7                                                    | -2.6                                                    | -                               | -1.6                                              | -0.2                                        | 3.7                                                           | -                            |
| SouthPeruCoast_1480-515BP (EIP-LIP)       | -                           | 2.0                                             | 4.0                                                 | 3.0                                                       | -1.7                                                       | -                                    | 0.2                                                        | 1.8                                               | -                                              | 4.9                                                | -2.1                                  | -                | -1.1                                  | -                            | -2.0                                                    | -3.1                                                    | 2.4                                                  | 4.9                                                    | -1.1                                                    | -                               | 0.6                                               | 2.5                                         | 3.0                                                           | -                            |
| SouthPeruHighlands_1150-390BP (MH-LH)     | -                           | 0.2                                             | 3.5                                                 | 2.5                                                       | -2.0                                                       | -                                    | -0.5                                                       | 1.4                                               | 2.5                                            | -                                                  | -2.7                                  | -                | -1.0                                  | -                            | -1.9                                                    | -2.1                                                    | 2.1                                                  | 6.5                                                    | -2.2                                                    | -                               | -1.7                                              | -0.4                                        | 3.2                                                           | -                            |
| Cuncaicha_9000BP (EA)                     | -                           | -1.3                                            | 0.1                                                 | -0.2                                                      | -0.6                                                       | -                                    | -0.5                                                       | -0.6                                              | -1.6                                           | -0.4                                               | -                                     | -                | -1.5                                  | -                            | -0.2                                                    | 0.7                                                     | 1.7                                                  | 0.0                                                    | -0.6                                                    | -                               | 0.7                                               | 0.2                                         | 2.8                                                           | -                            |
| Cuncaicha_4200BP (LA)                     | -                           | -0.1                                            | 1.9                                                 | 0.8                                                       | 0.1                                                        | -                                    | 0.4                                                        | -0.3                                              | -                                              | -                                                  | -                                     | -                | -                                     | -                            | -2.7                                                    | 1.1                                                     | -0.9                                                 | -2.7                                                   | -0.1                                                    | -                               | -1.5                                              | -2.5                                        | 0.9                                                           | -                            |
| Cuncaicha_3300BP (IP)                     | -                           | 0.8                                             | 1.6                                                 | 1.3                                                       | -0.1                                                       | -                                    | -0.6                                                       | 1.4                                               | -4.2                                           | -2.9                                               | -4.4                                  | -                | -                                     | -                            | -4.1                                                    | -1.1                                                    | -1.2                                                 | 1.1                                                    | -0.2                                                    | -                               | -0.9                                              | -0.9                                        | 1.9                                                           | -                            |
| Cusco_SanSebastian_610-490BP (LIP-LH)     | -                           | -1.0                                            | 2.1                                                 | 0.9                                                       | -1.8                                                       | -                                    | -0.8                                                       | 0.7                                               | -0.8                                           | -0.2                                               | -3.4                                  | -                | -2.1                                  | -                            | -                                                       | -                                                       | 1.4                                                  | 1.8                                                    | -1.6                                                    | -                               | -2.8                                              | -1.1                                        | 1.1                                                           | -                            |
| Cusco_Torontoy_A_450BP (LH)               | -                           | 1.3                                             | 2.4                                                 | 1.9                                                       | -2.0                                                       | -                                    | 0.8                                                        | 2.6                                               | 0.2                                            | 1.5                                                | -1.9                                  | -                | -3.9                                  | -                            | -                                                       | -0.4                                                    | -1.1                                                 | 1.4                                                    | -2.8                                                    | -                               | -2.6                                              | -1.3                                        | 3.4                                                           | -                            |
| Cusco_Torontoy_B_450BP (LH)               | -                           | -1.9                                            | 0.0                                                 | -1.2                                                      | -2.3                                                       | -                                    | 0.5                                                        | -1.2                                              | -4.0                                           | -2.3                                               | -3.3                                  | -                | -4.0                                  | -                            | -0.7                                                    | -                                                       | -2.5                                                 | -4.6                                                   | -2.8                                                    | -                               | 6.0                                               | -3.4                                        | 2.4                                                           | -                            |
| TiticacaBasin_Tiwanaku_1000BP (MH)        | -                           | -0.2                                            | 0.9                                                 | 1.2                                                       | -1.6                                                       | -                                    | -0.7                                                       | 0.6                                               | -2.5                                           | -1.0                                               | -3.1                                  | -                | -3.2                                  | -                            | -4.0                                                    | 0.0                                                     | -                                                    | -1.1                                                   | -1.6                                                    | -                               | -2.1                                              | -4.2                                        | 1.7                                                           | -                            |
| TiticacaBasin_Chile_Pukara_700BP (LIP)    | -                           | 0.1                                             | 2.1                                                 | 1.5                                                       | -0.9                                                       | -                                    | 0.7                                                        | 1.0                                               | 1.9                                            | 4.9                                                | -1.9                                  | -                | 0.2                                   | -                            | -2.4                                                    | -3.1                                                    | -0.4                                                 | -                                                      | -1.5                                                    | -                               | -0.9                                              | -0.2                                        | 2.0                                                           | -                            |
| TiticacaBasin_RioUncallane_1700BP (EIP)   | -                           | -0.8                                            | 1.1                                                 | 1.1                                                       | -1.7                                                       | -                                    | -0.3                                                       | 0.2                                               | -7.5                                           | -5.8                                               | -6.5                                  | -                | -4.6                                  | -                            | -3.5                                                    | 2.6                                                     | -2.8                                                 | -4.6                                                   | -                                                       | -                               | -3.4                                              | -6.5                                        | 4.3                                                           | -                            |
| TiticacaBasin_MiraFlores_1100BP (MH)      | -                           | 0.0                                             | 1.1                                                 | 1.2                                                       | -2.2                                                       | -                                    | -1.3                                                       | 0.7                                               | -6.2                                           | -4.0                                               | -5.3                                  | -                | -3.8                                  | -                            | -3.3                                                    | 3.8                                                     | -                                                    | -                                                      | -                                                       | -                               | -                                                 | -                                           | 3.4                                                           | -                            |
| TiticacaBasin_Iroco_1050BP (MH)           | -                           | 0.5                                             | 1.8                                                 | 0.4                                                       | -1.2                                                       | -                                    | -0.4                                                       | 0.3                                               | -2.5                                           | -2.5                                               | -2.3                                  | -                | -2.6                                  | -                            | -1.2                                                    | 10                                                      | -1.0                                                 | -1.7                                                   | -1.4                                                    | -                               | -                                                 | -0.7                                        | 2.4                                                           | -                            |
| NorthChile_1350-570BP (MH-LIP)            | -                           | 1.5                                             | 2.2                                                 | 3.5                                                       | -0.5                                                       | -                                    | -0.7                                                       | 1.8                                               | -1.9                                           | -1.6                                               | -3.5                                  | -                | -2.7                                  | -                            | -2.4                                                    | 1.1                                                     | -0.6                                                 | 1.5                                                    | 1.0                                                     | -                               | 1.9                                               | -                                           | 2.8                                                           | -                            |
| Argentina_LagunaChica_1600BP              | -                           | 0.6                                             | 0.8                                                 | 1.2                                                       | -1.1                                                       | -                                    | -0.8                                                       | 1.5                                               | 0.0                                            | 1.0                                                | -0.1                                  | -                | -0.5                                  | -                            | 1.9                                                     | 0.9                                                     | -1.0                                                 | -0.1                                                   | -1.7                                                    | -                               | -1.0                                              | 0.1                                         | -                                                             | -                            |
| Argentina_LagunaChica_8600BP              | -                           | 0.4                                             | 0.7                                                 | -0.1                                                      | 1.2                                                        | -                                    | -2.0                                                       | 0.2                                               | -1.4                                           | 0.4                                                | -1.9                                  | -                | -1.9                                  | -                            | -1.0                                                    | -0.8                                                    | 0.5                                                  | 0.6                                                    | -2.9                                                    | -                               | -0.8                                              | 1.0                                         | -                                                             | -                            |
